# Supplementary figures and images for: Structural Strength Analyses for Low Brass Filler Biomaterial with Anti-Trauma Effects in Articular Cartilage Scaffold Design
Source: MDPI journal article supplement (doi:10.3390/ma15134446), 2022-06-24

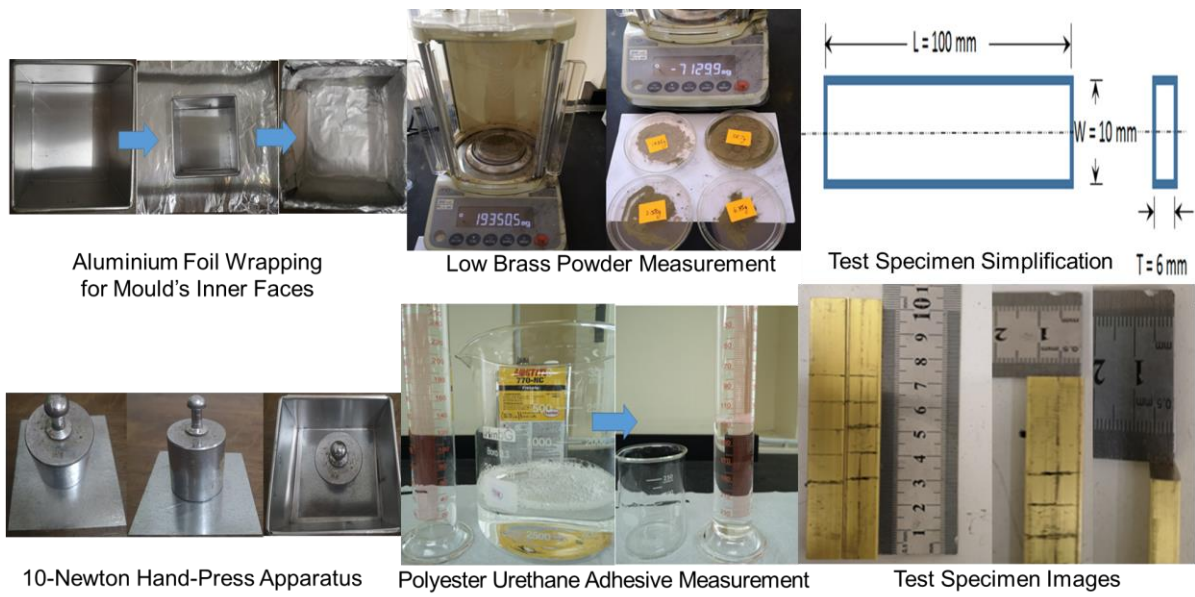

**Figure S1.** Preparations of test specimens.

Supplement: s1 [file s1]
